# Supplementary material
Source: PubMed Central journal article supplement (PMC2265192)
Supplement: pnas_0712331105_6.pdf [file pnas_0712331105_6.pdf]

**Table 4. Regions of GlpD protected by  $\beta$ -OG and phospholipid vesicles missed trypsin cut sites in reconstituted GlpD**

| <b>Protein</b>                                | <b>Missed cutting sites (consensus sites from three replicates)</b>                                                | <b>Total percent of protein digested (after 30 min)</b> |
|-----------------------------------------------|--------------------------------------------------------------------------------------------------------------------|---------------------------------------------------------|
| GlpD in $\beta$ -OG                           | 4, 25, 47, 88, 102, 113, 114, 124, 136, 137, 150, 161, 162, 169, 171, 230, 253, 283, 301, 354, 360, 368, 469, 470. | 40%                                                     |
| GlpD in <i>E. coli</i> phospholipids vesicles | 4, 25, 47, 86, 88, 102, 113, 114, 124, 136, 137, 150, 161, 162, 169, 171, 230, 281, 357, 360, 368, 469, 470.       | 43%                                                     |
| GK in $\beta$ -OG                             | Extensive/complete fragmentation                                                                                   | >86%                                                    |
