# Supplementary material
Source: PubMed Central journal article supplement (PMC2265192)
Supplement: pnas_0712331105_7.pdf [file pnas_0712331105_7.pdf]

**Table 5. GlpD assay results in the presence of various ubiquinones and electron couplers**

| Electron coupler                                      | Structure                                                                           | Activity (% normalized) |
|-------------------------------------------------------|-------------------------------------------------------------------------------------|-------------------------|
| PMS<br>(Phenazine<br>methosulfate)                    | 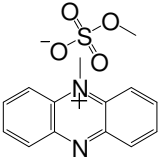   | 100                     |
| Coenzyme Q1*                                          |    | 11 (42)*                |
| Coenzyme Q10                                          |    | 17                      |
| HQNO<br>(2-heptyl-4-<br>hydroxyquinoline N-<br>oxide) |   | 17                      |
| Menadione                                             |  | 100                     |

Reconstituted GlpD in *E. coli* total lipid was assayed in a buffer containing 50 mM Tris•HCl, 75 mM NaCl, 20 mM G3P, 1 µg/ml GlpD, 0.5 mM MTT, and 0.2 mM PMS or substituted by the defined coupler. The reaction was followed at 570 nm for MTT reduction. The activities were normalized against GlpD activity in the presence of PMS.

\*For Coenzyme Q1, GlpD activity was low initially, and became higher and reached a steady stage after about 60 s, as indicated.
