# Supplementary material
Source: PubMed Central journal article supplement (PMC2265192)

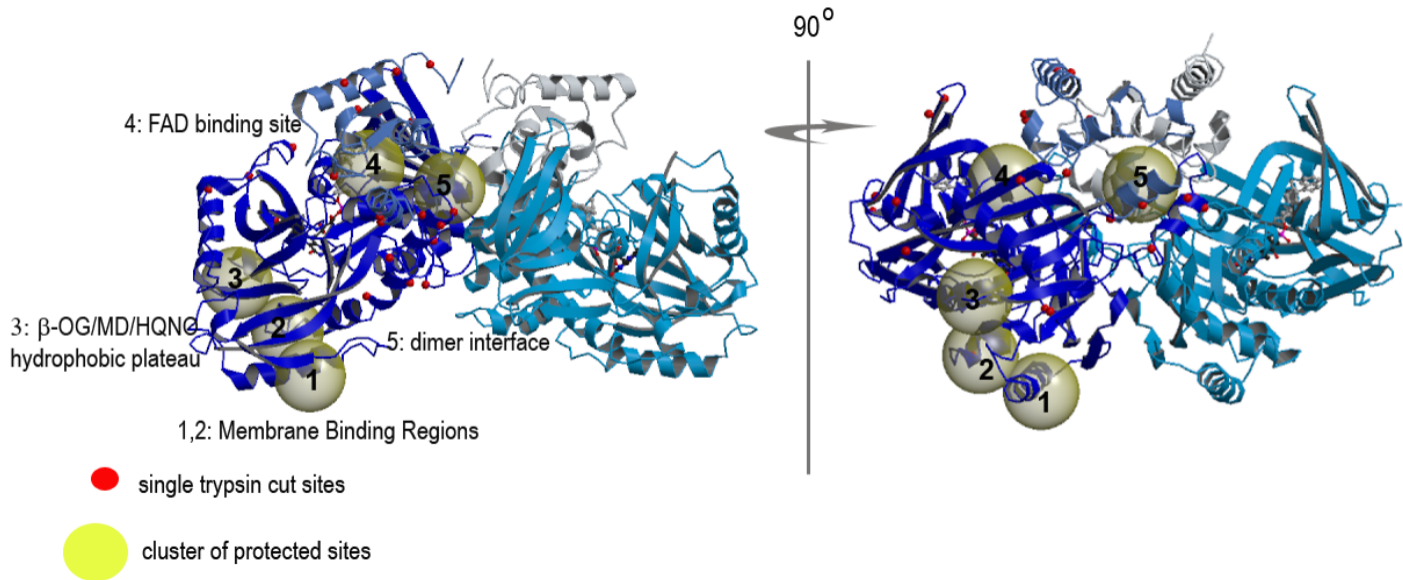

Supplement: pnas_0712331105_1.pdf [file pnas_0712331105_1.pdf]

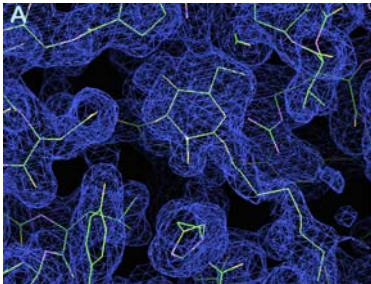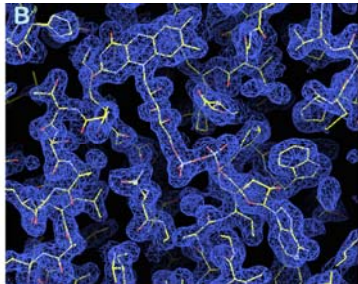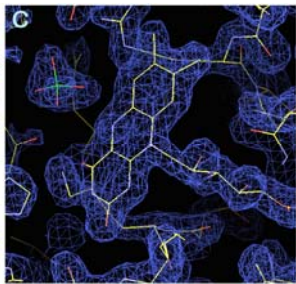

Supplement: pnas_0712331105_2.pdf [file pnas_0712331105_2.pdf]

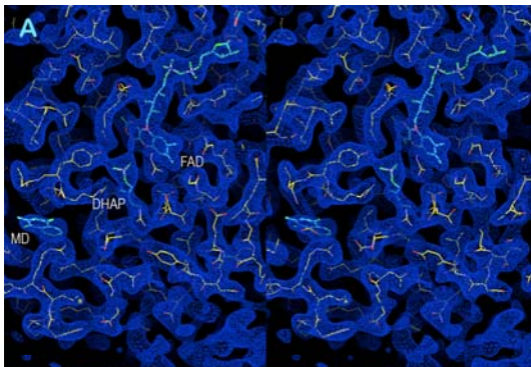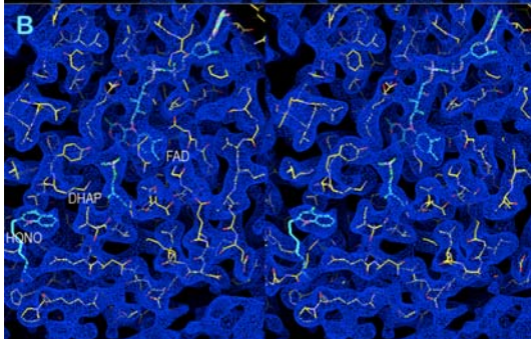

Supplement: pnas_0712331105_3.pdf [file pnas_0712331105_3.pdf]

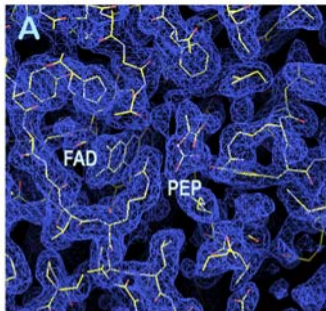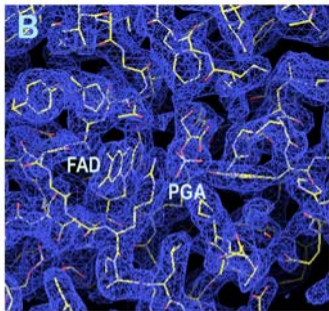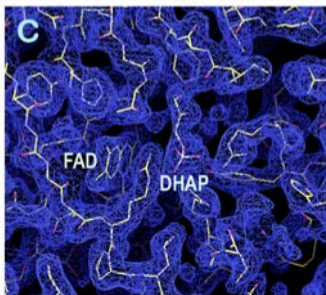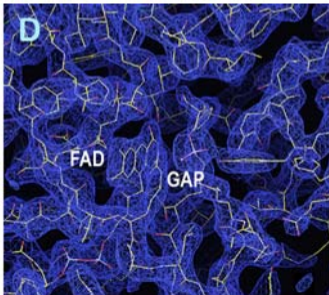

Supplement: pnas_0712331105_4.pdf [file pnas_0712331105_4.pdf]

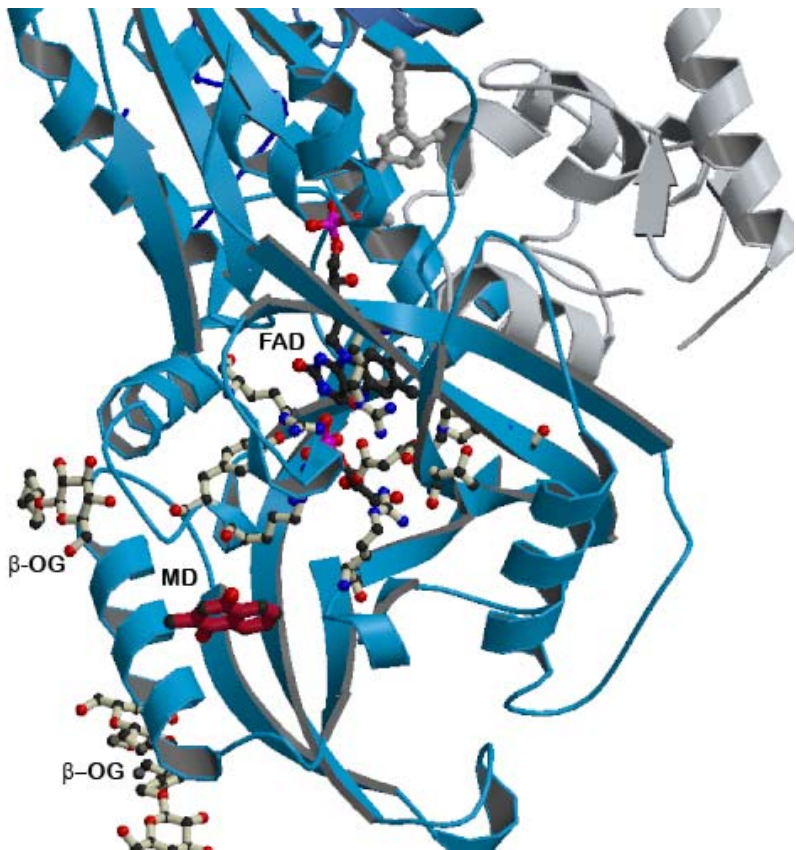

Supplement: pnas_0712331105_5.pdf [file pnas_0712331105_5.pdf]
